# Supplementary material for: Large1 gene transfer in older myd mice with severe muscular dystrophy restores muscle function and greatly improves survival
Source: PubMed Central journal article supplement (PMC9132445; doi:10.1126/sciadv.abn0379), 2022-05-25
Supplement: sciadv.abn0379_sm.pdf [file sciadv.abn0379_sm.pdf]

Supplementary Materials for

***Large1* gene transfer in older *myd* mice with severe muscular dystrophy restores muscle function and greatly improves survival**

Takahiro Yonekawa *et al.*

Corresponding author: Eric B. Taylor, [eric-taylor@uiowa.edu](mailto:eric-taylor@uiowa.edu); Kevin P. Campbell, [kevin-campbell@uiowa.edu](mailto:kevin-campbell@uiowa.edu)

*Sci. Adv.* **8**, eabn0379 (2022)  
DOI: 10.1126/sciadv.abn0379

**This PDF file includes:**

Figs. S1 to S7  
Tables S1 and S2

SUPPLEMENTAL FIGURES

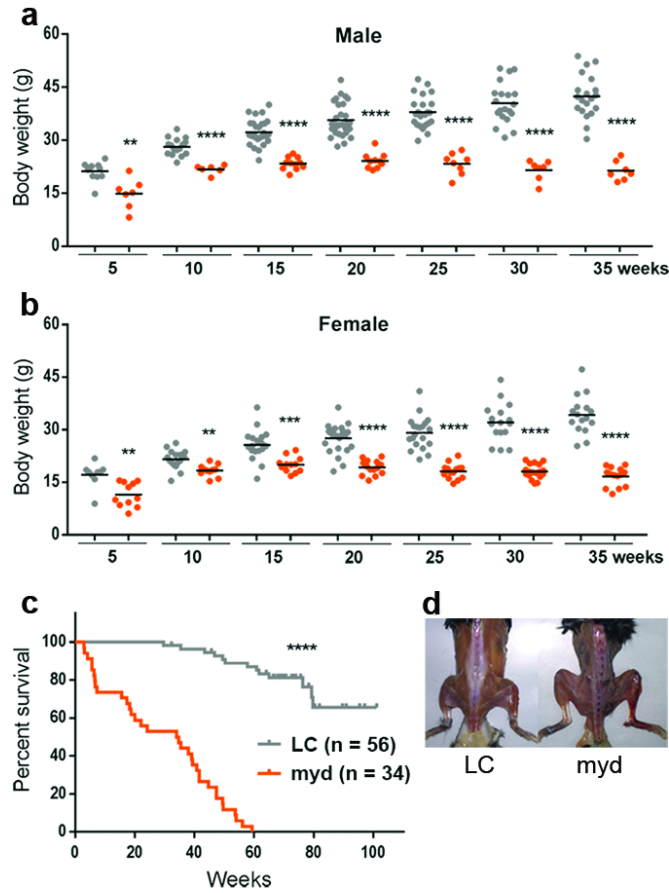

**Fig. S1 | *myd* mice show growth retardation, a shortened lifespan, and muscle wasting.**

**a, b**, Body weights of male (**a**; littermate control (LC): n=20, *myd*: n=7) and female (**b**; LC: n=16; *myd*: n=14) mice, which were weighed weekly, with weights compared at 5-week intervals. **c**, Percent survival of LC and *myd* mice. **d**, Image of a *myd* mouse depicting thoracic kyphosis and muscle wasting; 68.1-week-old LC mouse (left), 41.6-week-old *myd* mouse (right). For panels **a** and **b**, symbols represent individual mice, bars represent means. LC are gray symbols; *myd* (myd) are orange symbols. \* p<0.05; \*\* p<0.01, \*\*\* p<0.001; \*\*\*\* p<0.0001.

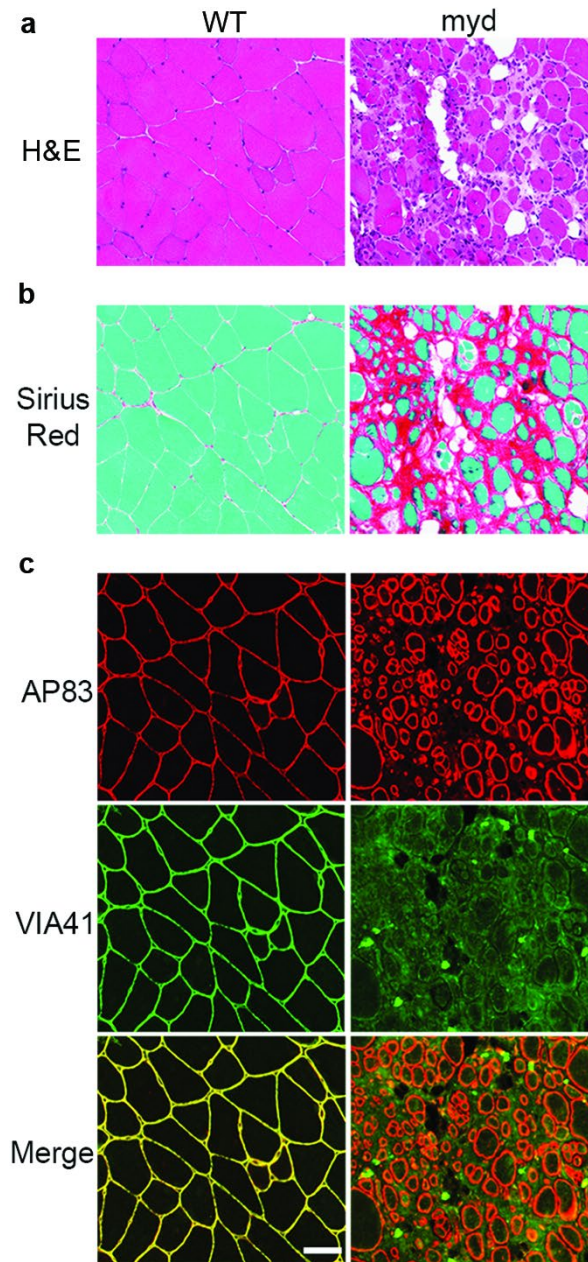

**Fig. S2 | Quadriceps muscles from aged *myd* mice exhibit severe dystrophic pathology and lack matriglycan.**

Quadriceps muscle cryosections from a 69.0-week-old C57BL/6J (WT) mouse and a 41.6-week-old *myd* (*myd*) mouse. **a, b**, Cryosections stained with H&E or Sirius Red & Fast Green. **c**, Immunofluorescence analysis of cryosections for β-DG (AP83) or matriglycan (VIA41). Scale bar represents 50 μm.

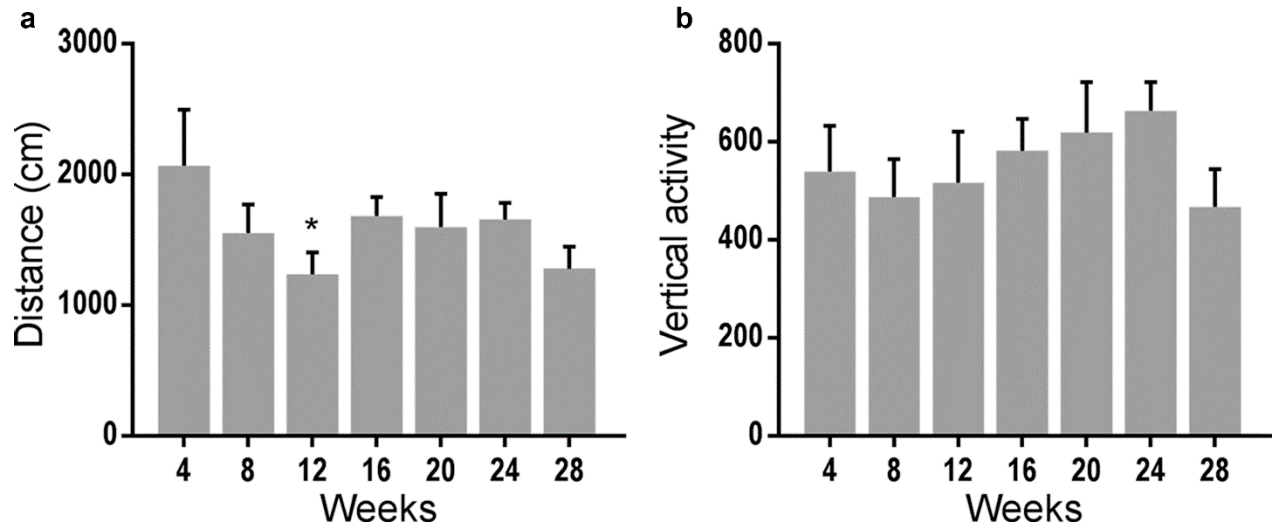

**Fig. S3 | Chronological evaluation of locomotion and rearing activity in C57BL/6J WT mice.**

**a, b,** Spontaneous locomotion (distance) and rearing (vertical activity) were measured every four weeks in C57BL/6J WT mice. Paired t-tests were used to compare the parameters between baseline activity and that at 4, 8, 12, 16, 20, 24, and 28 weeks ( $n = 6$ ). Bars represent mean  $\pm$  SEM. \*  $p < 0.05$ .

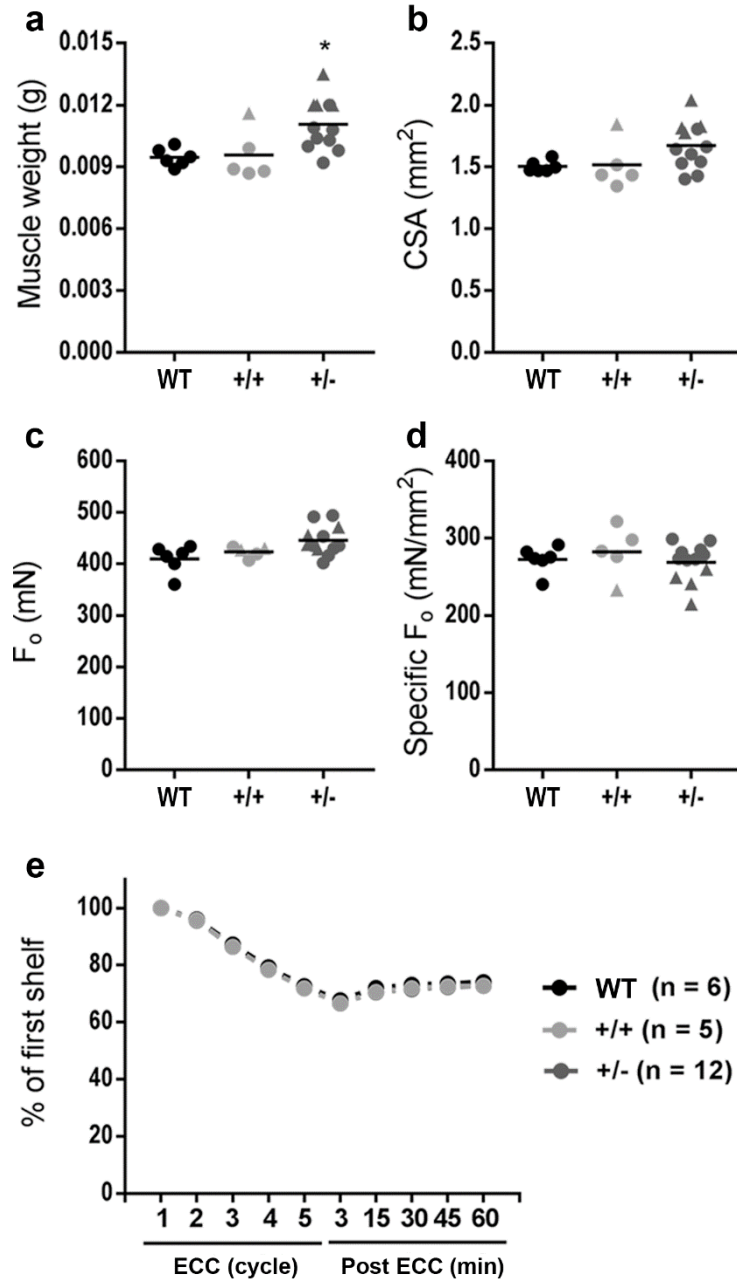

**Fig. S4 | Muscle size, contractile properties, and lengthening contraction-induced muscle damage is similar in EDL muscles from +/+ or +/- mice.**

**a**, Muscle weight, **b**, whole-muscle CSA, **c**, isometric tetanic force ( $F_0$ ), and **d**, specific isometric tetanic force ( $F_0/CSA$ ) were measured in C57Bl/6J (WT), +/+, and +/- mice. Unpaired t-tests were used to compare the parameters between +/+ and +/- mice. **e**, Percentages of  $F_0$  at the 2<sup>nd</sup>, 3<sup>rd</sup>, 4<sup>th</sup>, or 5<sup>th</sup> eccentric contraction (ECC) cycle, and at 3, 15, 30, 45, and 60 min after the eccentric contraction protocol (Post ECC) were calculated as a relative value to  $F_0$  at the 1<sup>st</sup> ECC, in mice as in (a). Filled triangles are male; filled circles are female. WT are black symbols; +/+ are light gray symbols; +/- are dark gray symbols. \*  $p < 0.05$ .

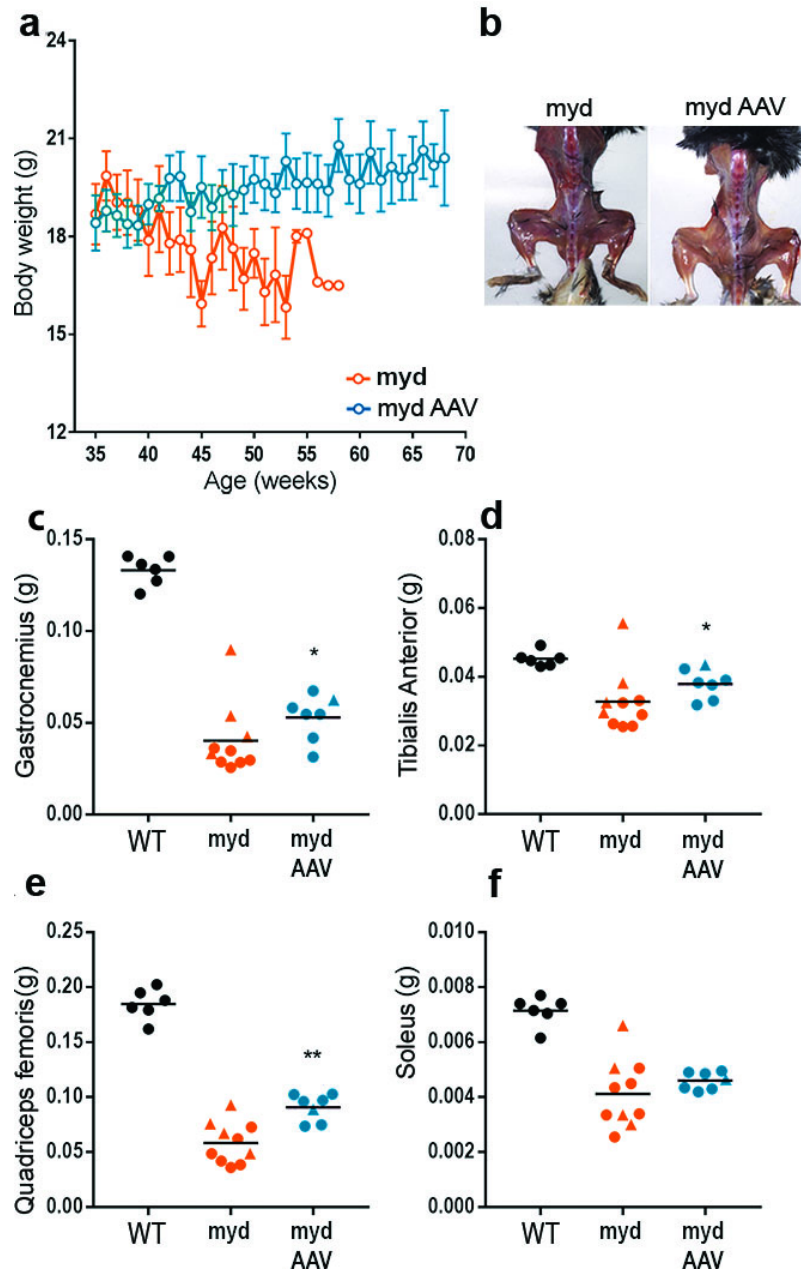

**Fig. S5 | AAV-mediated *Large1* gene transfer improves muscle mass in *myd* mice.**

**a**, Body weight of untreated (orange) or AAV*Large1*-treated (blue) *myd* mice. Mice were treated with AAV*Large1* at >35 weeks and weighed weekly for at least 30 weeks. Linear regression analysis was performed, and both slopes were significantly non-zero: untreated,  $Y = -0.1125 \cdot X + 22.88$ ; treated,  $Y = 0.05238 \cdot X + 16.85$ . **b**, Gross analysis of mice treated as in **(a)**; 40.7-week-old untreated mouse (left), 68.1-week-old treated mouse (right). **c-f**, Weight of the gastrocnemius **c**, tibialis anterior **d**, quadriceps femoris **e**, and soleus **f**, muscles from C57Bl/6J (WT) mice, untreated (*myd*), or treated (*myd* AAV) *myd* mice as in **(a)**. Average weights were compared between untreated and treated groups using Mann-Whitney or unpaired t-test. Symbols represent individual mice, bars represent mean  $\pm$  SEM. Filled triangles are male; filled circles are female. WT are black symbols; *myd* are orange symbols; *myd* AAV are blue symbols. \*  $p < 0.05$ ; \*\*  $p < 0.01$ .

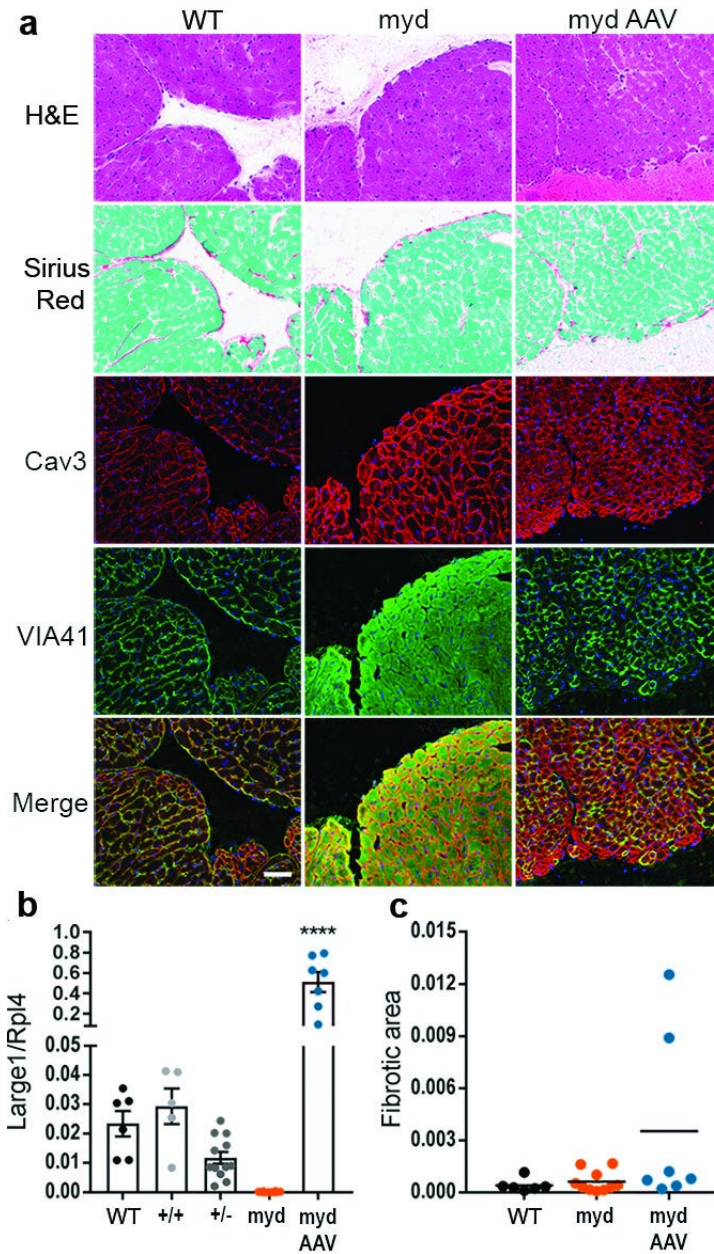

**Fig. S6 | Restoring *Large1* expression improves muscle pathology, immunohistochemistry, and morphometric analysis of cardiac transverse sections.**

**a**, Representative cardiac transverse sections from a 68.1-week-old C57BL/6J (WT) mouse, a 56.1-week-old *myd* (*myd*) mouse, and a 69.3-week-old *myd* mouse treated with AAV*Large1* (*myd* AAV). From top to bottom: sections stained with H&E, sections stained with Sirius Red & Fast Green, and immunofluorescence analysis of sections for:  $\beta$ -DG (AP83) and matriglycan (VIA41). Scale bar represents 50 $\mu$ m. **b**, ddPCR analysis of *Large1* expression relative to *Rpl4* expression in cardiac muscle from C57Bl/6J mice (WT; n = 6), +/+ (n = 5) and +/- *myd* (+/-; n = 12), untreated *myd* (*myd*; n = 10), and *myd* mice treated with AAV*Large1* (*myd* AAV; n = 7). Symbols represent individual mice, bars represent mean  $\pm$  SEM. **c**, Connective tissue deposition to assess fibrosis, determined by Sirius Red & Fast Green staining in (**a**). Untreated and treated groups compared with unpaired t-test.

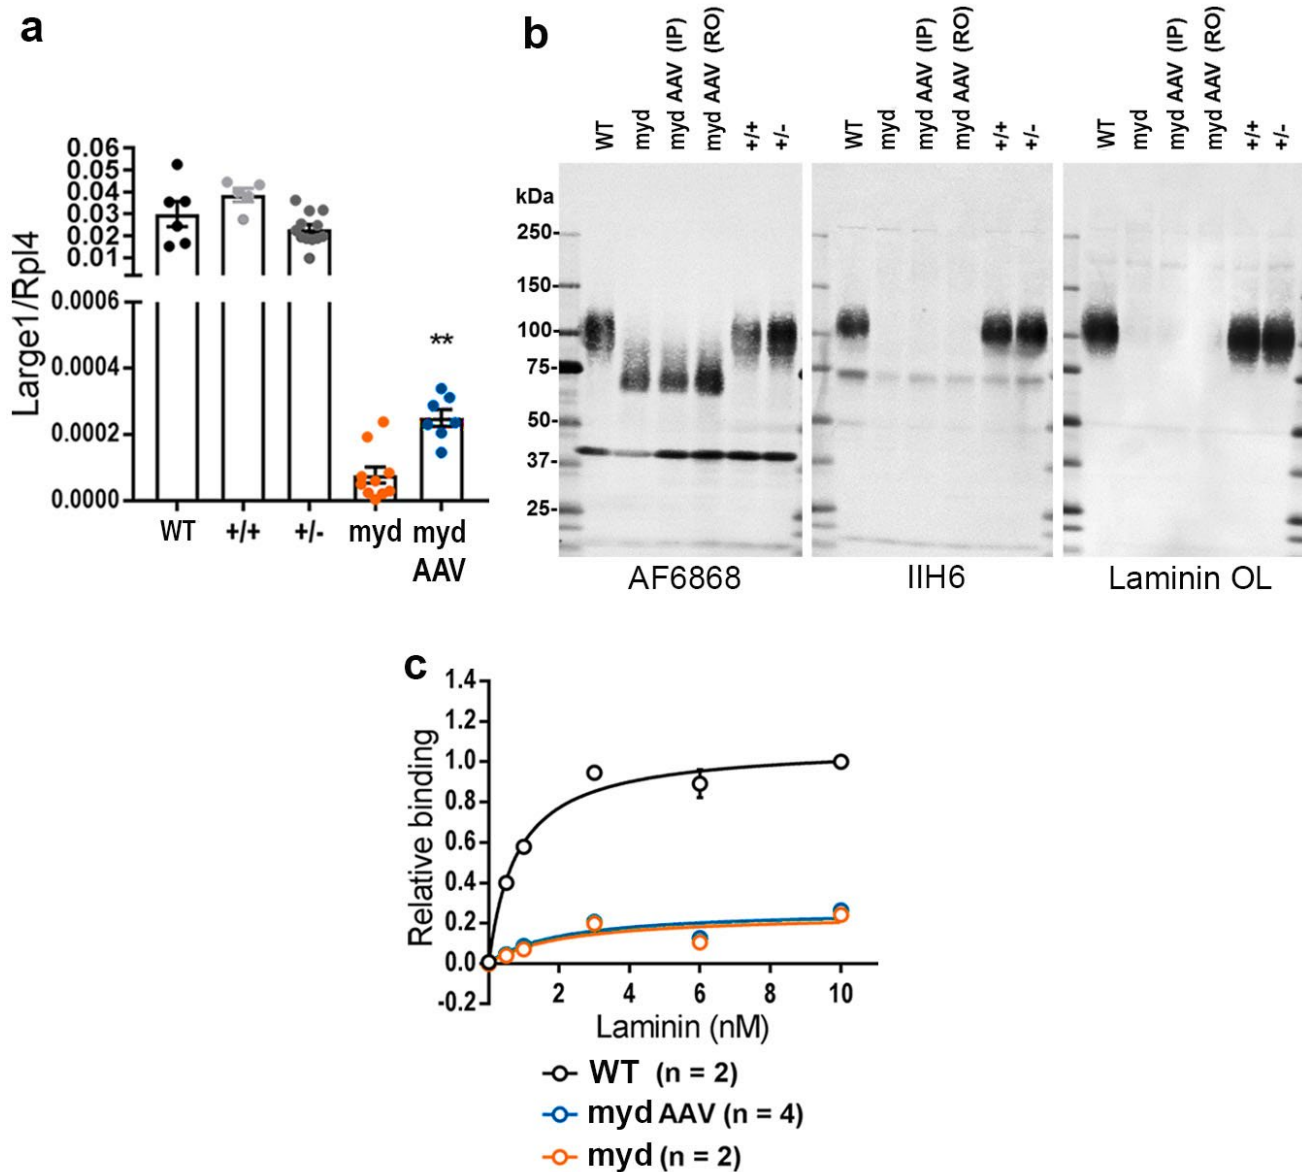

**Fig. S7 | *Large1* Expression, biochemical analysis of  $\alpha$ -DG and  $\alpha$ -DG–ligand binding in the brain of wild-type, *myd*, and *myd* mice injected with AAV*Large1*.**

**a**, ddPCR analysis of *Large1* expression relative to *Rpl4* expression (*Large1/Rpl4*) in brains from aged C57Bl/6J mice (WT; n = 6), +/+ (n = 5), +/*myd* (+/-; n = 12), untreated *myd* mice (*myd*; n = 10), and *myd* mice treated with AAV*Large1* (*myd* AAV; n = 7). Symbols represent individual mice, bars represent mean  $\pm$  SEM. Mann-Whitney test was used to compare gene expression between treated and untreated *myd* mice. WT are black symbols; +/+ are light gray symbols; +/- are dark gray symbols; *myd* are orange symbols; *myd* AAV are blue symbols. **b**, Western blot analysis of WGA-enriched brain homogenates from aged C57Bl/6J mice (WT), +/+, +/*myd* (+/-), untreated *myd* (*myd*), or *myd* mice treated with AAV*Large1* via intraperitoneal (*myd* AAV (IP)) or retro-orbital (*myd* AAV (RO)) injection to assess expression of  $\beta$ -DG (AF6868),  $\alpha$ -DG reactive to IIH6, or laminin (laminin OL). **c**, Solid-phase binding assay of WGA-enriched brain glycoproteins of aged C57Bl/6J (WT), untreated *myd* (*myd*), or *myd* mice treated with AAV*Large1* (*myd* AAV). \*\*p<0.01.



SUPPLEMENTARY DATA TABLES

| Metabolite                                 | +/+          | Myd          | Myd AAV      | p-values      |                                             |                |                |
|--------------------------------------------|--------------|--------------|--------------|---------------|---------------------------------------------|----------------|----------------|
|                                            |              |              |              | One-Way ANOVA | Post-hoc (Tukey's multiple comparison test) |                |                |
|                                            |              |              |              |               | +/+ vs Myd                                  | +/+ vs Myd AAV | Myd vs Myd AAV |
| 1-Octadecanol                              | 1.00 ± 0.022 | 0.96 ± 0.027 | 0.99 ± 0.029 | 0.587         | 0.5841                                      | 0.9829         | 0.7105         |
| 2-Hydroxybutyrate                          | 1.00 ± 0.05  | 1.07 ± 0.069 | 0.89 ± 0.09  | 0.2164        | 0.7547                                      | 0.4998         | 0.1953         |
| 2-Hydroxyglutarate                         | 1.00 ± 0.079 | 0.37 ± 0.03  | 0.71 ± 0.112 | <0.0001       | <0.0001                                     | 0.0351         | 0.022          |
| 2-Oxoadipate                               | 1.00 ± 0.051 | 0.97 ± 0.053 | 1.25 ± 0.132 | 0.0496        | 0.9705                                      | 0.0915         | 0.0749         |
| 3-Phosphoglycerate                         | 1.00 ± 0.043 | 1.49 ± 0.116 | 1.12 ± 0.092 | 0.0004        | 0.0003                                      | 0.5389         | 0.0107         |
| 6-Phosphogluconate                         | 1.00 ± 0.055 | 0.96 ± 0.057 | 0.85 ± 0.059 | 0.1644        | 0.8472                                      | 0.1462         | 0.4382         |
| Aconitate                                  | 1.00 ± 0.12  | 0.88 ± 0.115 | 1.15 ± 0.152 | 0.3796        | 0.7913                                      | 0.6927         | 0.3487         |
| Adonitol                                   | 1.00 ± 0.055 | 0.9 ± 0.053  | 1.13 ± 0.054 | 0.0219        | 0.4288                                      | 0.2011         | 0.0169         |
| Alanine                                    | 1.00 ± 0.046 | 0.94 ± 0.072 | 1.19 ± 0.088 | 0.0348        | 0.8232                                      | 0.1076         | 0.0393         |
| alpha-Keto-beta-Methylvalerate (KMV)       | 1.00 ± 0.053 | 0.67 ± 0.034 | 0.71 ± 0.099 | 0.0011        | 0.0025                                      | 0.0079         | 0.8941         |
| alpha-Ketoglutarate                        | 1.00 ± 0.061 | 0.52 ± 0.039 | 0.87 ± 0.087 | <0.0001       | <0.0001                                     | 0.3375         | 0.0019         |
| alpha-Ketoisocaproate (KIC)                | 1.00 ± 0.034 | 0.76 ± 0.032 | 0.86 ± 0.047 | 0.0002        | 0.0001                                      | 0.0251         | 0.2131         |
| alpha-Ketoglutarate (KIV)                  | 1.00 ± 0.059 | 0.77 ± 0.057 | 0.8 ± 0.09   | 0.0424        | 0.0594                                      | 0.1124         | 0.9413         |
| Aminoadipate                               | 1.00 ± 0.036 | 0.9 ± 0.048  | 1.07 ± 0.047 | 0.0418        | 0.2694                                      | 0.4913         | 0.0325         |
| Arachidic acid (Eicosanoic acid)           | 1.00 ± 0.024 | 0.98 ± 0.037 | 0.89 ± 0.037 | 0.0375        | 0.9019                                      | 0.0379         | 0.1359         |
| Asparagine                                 | 1.00 ± 0.055 | 1.2 ± 0.072  | 1.39 ± 0.095 | 0.0013        | 0.1402                                      | 0.0009         | 0.2001         |
| Aspartate                                  | 1.00 ± 0.043 | 1.00 ± 0.074 | 0.85 ± 0.053 | 0.0973        | >0.9999                                     | 0.1287         | 0.1635         |
| beta-Alanine                               | 1.00 ± 0.018 | 0.97 ± 0.029 | 0.97 ± 0.026 | 0.6082        | 0.7267                                      | 0.6295         | 0.991          |
| beta-Hydroxy beta-Methylbutyric acid (HMB) | 1.00 ± 0.018 | 1.02 ± 0.031 | 1.00 ± 0.03  | 0.7862        | 0.7949                                      | 0.9979         | 0.839          |
| Cholesterol                                | 1.00 ± 0.029 | 0.94 ± 0.034 | 0.78 ± 0.043 | 0.0001        | 0.4871                                      | <0.0001        | 0.008          |
| Citraconate                                | 1.00 ± 0.063 | 0.87 ± 0.086 | 0.98 ± 0.097 | 0.5211        | 0.5203                                      | 0.9816         | 0.6531         |
| Citrate                                    | 1.00 ± 0.038 | 0.81 ± 0.04  | 0.79 ± 0.061 | 0.0029        | 0.0172                                      | 0.0058         | 0.9503         |
| Citrulline                                 | 1.00 ± 0.044 | 1.08 ± 0.054 | 1.15 ± 0.061 | 0.0786        | 0.232                                       | 0.7666         | 0.0717         |
| Cysteine                                   | 1.00 ± 0.043 | 0.86 ± 0.058 | 1.06 ± 0.074 | 0.5211        | 0.5203                                      | 0.9816         | 0.6531         |
| Dihydroxyacetone phosphate (DHAP)          | 1.00 ± 0.118 | 2.14 ± 0.287 | 1.14 ± 0.155 | 0.0001        | 0.0002                                      | 0.8511         | 0.0012         |
| Fructose                                   | 1.00 ± 0.042 | 1.2 ± 0.141  | 1.19 ± 0.109 | 0.2608        | 0.3354                                      | 0.3497         | 0.9979         |
| Fructose 6-phosphate                       | 1.00 ± 0.05  | 1.47 ± 0.131 | 0.95 ± 0.068 | <0.0001       | 0.0006                                      | 0.9071         | 0.0002         |
| Fumarate                                   | 1.00 ± 0.044 | 0.72 ± 0.054 | 0.87 ± 0.068 | 0.0035        | 0.0023                                      | 0.1929         | 0.2001         |
| Gamma-aminobutyric acid (GABA)             | 1.00 ± 0.085 | 1.14 ± 0.079 | 1.17 ± 0.131 | 0.3893        | 0.5641                                      | 0.4166         | 0.9764         |
| Glucose                                    | 1.00 ± 0.023 | 0.81 ± 0.049 | 0.82 ± 0.034 | 0.0002        | 0.0011                                      | 0.0014         | 0.9854         |
| Glucose 6-phosphate                        | 1.00 ± 0.125 | 1.56 ± 0.159 | 1.15 ± 0.292 | 0.0042        | 0.017                                       | 0.8515         | 0.006          |
| Glutamate                                  | 1.00 ± 0.03  | 0.95 ± 0.042 | 0.89 ± 0.038 | 0.0815        | 0.6009                                      | 0.0654         | 0.4514         |
| Glutamine                                  | 1.00 ± 0.041 | 1.11 ± 0.052 | 1.01 ± 0.063 | 0.3046        | 0.3128                                      | 0.9794         | 0.4392         |
| Glycerate                                  | 1.00 ± 0.02  | 1.09 ± 0.04  | 1.09 ± 0.041 | 0.09          | 0.1751                                      | 0.1242         | 0.992          |
| Glycerol                                   | 1.00 ± 0.064 | 0.8 ± 0.058  | 0.92 ± 0.119 | 0.2086        | 0.1827                                      | 0.7675         | 0.5755         |
| Glycerol Monolaurate (GML)                 | 1.00 ± 0.046 | 0.89 ± 0.039 | 0.8 ± 0.054  | 0.0124        | 0.2426                                      | 0.0091         | 0.4016         |
| Glycine                                    | 1.00 ± 0.04  | 1.12 ± 0.032 | 1.16 ± 0.068 | 0.047         | 0.1981                                      | 0.0472         | 0.8227         |
| Heneicosylic acid (Heneicosanoic acid)     | 1.00 ± 0.02  | 0.96 ± 0.03  | 1.03 ± 0.053 | 0.0011        | 0.1231                                      | 0.0957         | 0.0007         |
| Heptadecanoic acid                         | 1.00 ± 0.018 | 1.08 ± 0.029 | 0.92 ± 0.035 | 0.3855        | 0.7115                                      | 0.7797         | 0.3519         |
| Histidine                                  | 1.00 ± 0.04  | 1.17 ± 0.052 | 1.14 ± 0.056 | 0.0359        | 0.0454                                      | 0.1179         | 0.8885         |
| Hypoxanthine                               | 1.00 ± 0.043 | 1.27 ± 0.146 | 1.06 ± 0.036 | 0.0715        | 0.0644                                      | 0.8363         | 0.2249         |
| Inositol                                   | 1.00 ± 0.049 | 1.37 ± 0.116 | 1.25 ± 0.074 | 0.0042        | 0.004                                       | 0.0634         | 0.543          |
| Isocitrate                                 | 1.00 ± 0.048 | 0.88 ± 0.05  | 0.78 ± 0.055 | 0.0117        | 0.2154                                      | 0.0088         | 0.4321         |
| Isoleucine                                 | 1.00 ± 0.045 | 1.04 ± 0.048 | 1.17 ± 0.06  | 0.0562        | 0.8237                                      | 0.0503         | 0.2228         |
| Lactate                                    | 1.00 ± 0.024 | 0.69 ± 0.038 | 0.86 ± 0.041 | <0.0001       | <0.0001                                     | 0.0142         | 0.0023         |
| Lauric acid                                | 1.00 ± 0.039 | 1.01 ± 0.036 | 0.95 ± 0.042 | 0.443         | 0.9614                                      | 0.5767         | 0.4579         |
| Leucine                                    | 1.00 ± 0.068 | 1.1 ± 0.063  | 1.37 ± 0.119 | 0.0084        | 0.7004                                      | 0.0071         | 0.0846         |
| Linoleate                                  | 1.00 ± 0.029 | 1.23 ± 0.066 | 1.01 ± 0.057 | 0.0029        | 0.0053                                      | 0.9949         | 0.0097         |
| Linolenic acid                             | 1.00 ± 0.057 | 1.48 ± 0.12  | 1.1 ± 0.108  | 0.0017        | 0.0016                                      | 0.7285         | 0.0189         |
| Lysine                                     | 1.00 ± 0.039 | 1.35 ± 0.067 | 1.23 ± 0.061 | <0.0001       | <0.0001                                     | 0.0082         | 0.294          |
| Malate                                     | 1.00 ± 0.044 | 0.82 ± 0.05  | 0.86 ± 0.066 | <0.0001       | <0.0001                                     | 0.1551         | 0.0089         |
| Mannose                                    | 1.00 ± 0.055 | 0.99 ± 0.072 | 0.75 ± 0.059 | 0.0068        | 0.9966                                      | 0.0114         | 0.0229         |
| Methionine                                 | 1.00 ± 0.067 | 1.18 ± 0.098 | 1.38 ± 0.131 | 0.0263        | 0.4049                                      | 0.0195         | 0.3693         |
| Myristic acid                              | 1.00 ± 0.067 | 1.1 ± 0.077  | 0.91 ± 0.099 | 0.2949        | 0.6603                                      | 0.7116         | 0.2625         |
| N-acetylglutamate                          | 1.00 ± 0.052 | 0.86 ± 0.036 | 0.86 ± 0.022 | 0.0211        | 0.0474                                      | 0.0407         | 0.9851         |
| Oleic acid                                 | 1.00 ± 0.047 | 1.23 ± 0.078 | 0.94 ± 0.078 | 0.0116        | 0.0504                                      | 0.7757         | 0.0123         |
| O-Phosphoethanolamine                      | 1.00 ± 0.048 | 1.16 ± 0.072 | 1.00 ± 0.053 | 0.0948        | 0.1268                                      | >0.9999        | 0.1443         |
| Ornithine                                  | 1.00 ± 0.053 | 1.24 ± 0.11  | 1.26 ± 0.069 | 0.0273        | 0.0781                                      | 0.0421         | 0.9792         |
| Orotate                                    | 1.00 ± 0.056 | 1.15 ± 0.192 | 0.85 ± 0.064 | 0.1897        | 0.5754                                      | 0.5797         | 0.1628         |
| Palmitate                                  | 1.00 ± 0.026 | 1.11 ± 0.037 | 0.92 ± 0.048 | 0.0023        | 0.0799                                      | 0.2368         | 0.0015         |
| Phenylalanine                              | 1.00 ± 0.04  | 1.11 ± 0.052 | 1.17 ± 0.053 | 0.0303        | 0.2109                                      | 0.0266         | 0.6754         |
| Phosphoenolpyruvate                        | 1.00 ± 0.039 | 1.02 ± 0.039 | 0.93 ± 0.038 | 0.2564        | 0.9362                                      | 0.3976         | 0.2718         |
| Proline                                    | 1.00 ± 0.079 | 1.15 ± 0.122 | 1.49 ± 0.145 | 0.0102        | 0.6369                                      | 0.0081         | 0.1141         |
| Pyruvate                                   | 1.00 ± 0.046 | 0.74 ± 0.082 | 0.82 ± 0.049 | 0.0077        | 0.0079                                      | 0.0765         | 0.6341         |
| Ribose                                     | 1.00 ± 0.055 | 0.84 ± 0.065 | 0.8 ± 0.043  | 0.0265        | 0.1088                                      | 0.0317         | 0.894          |
| Serine                                     | 1.00 ± 0.048 | 1.23 ± 0.068 | 1.38 ± 0.087 | 0.0006        | 0.0519                                      | 0.0005         | 0.3112         |
| Stearate                                   | 1.00 ± 0.024 | 1.03 ± 0.03  | 0.91 ± 0.039 | 0.0225        | 0.7563                                      | 0.0899         | 0.0241         |
| Succinate                                  | 1.00 ± 0.141 | 0.99 ± 0.206 | 0.67 ± 0.044 | 0.1868        | 0.998                                       | 0.2182         | 0.2867         |
| Taurine                                    | 1.00 ± 0.075 | 1.34 ± 0.106 | 1.08 ± 0.11  | 0.0406        | 0.0352                                      | 0.8266         | 0.1642         |
| Threonine                                  | 1.00 ± 0.048 | 1.18 ± 0.074 | 1.28 ± 0.094 | 0.0195        | 0.1871                                      | 0.0165         | 0.6078         |
| Thymine                                    | 1.00 ± 0.064 | 1.00 ± 0.049 | 1.21 ± 0.101 | 0.08          | 0.9993                                      | 0.112          | 0.1352         |
| Tryptophan                                 | 1.00 ± 0.037 | 1.06 ± 0.06  | 1.15 ± 0.042 | 0.0696        | 0.5937                                      | 0.0553         | 0.4184         |
| Tyrosine                                   | 1.00 ± 0.069 | 1.12 ± 0.107 | 1.4 ± 0.143  | 0.0281        | 0.6931                                      | 0.0229         | 0.1929         |
| Uracil                                     | 1.00 ± 0.088 | 0.98 ± 0.051 | 0.98 ± 0.072 | 0.9736        | 0.9727                                      | 0.9874         | 0.997          |
| Urea                                       | 1.00 ± 0.03  | 0.98 ± 0.061 | 1.03 ± 0.037 | 0.7256        | 0.9267                                      | 0.8852         | 0.7047         |
| Valine                                     | 1.00 ± 0.043 | 1.00 ± 0.047 | 1.14 ± 0.062 | 0.0978        | 0.9984                                      | 0.1356         | 0.1554         |
| Xanthine                                   | 1.00 ± 0.206 | 2.64 ± 0.828 | 1.87 ± 1.053 | 0.1688        | 0.1476                                      | 0.6242         | 0.7203         |
| Xylose                                     | 1.00 ± 0.124 | 0.99 ± 0.174 | 0.66 ± 0.059 | 0.111         | 0.9974                                      | 0.1361         | 0.1944         |

Data Table 1 | Plasma Metabolomics

Relative fold change of plasma metabolites in WT (+/+, n = 26), *myd* (*myd*, n = 20), and *myd* mice treated with *AAVLarge1* (*myd* AAV, n = 22). Data are presented as mean ± SEM. Analysis by one-way ANOVA followed by Tukey's post hoc multiple comparison test. p-values from statistical analysis are reported.

**Data Table 2 | Primer design**

| Gene          | Forward                    | Reverse                        | Amplicon size (bp) |
|---------------|----------------------------|--------------------------------|--------------------|
| <i>Large1</i> | acc tgc agt gcg agt aga c  | cct gtt gcc ctt tga act tat gg | 224                |
| <i>Rpl4</i>   | cca aga cta tgc gca gga at | tgt ctg cag tcc cct tct ct     | 135                |
